# Supplementary material for: NiO microspheres with tunable porosity and morphology effects for CO oxidation
Source: Royal Society of Chemistry journal article supplement (doi:10.1039/c1cy00131k), 2011-01-01
Supplement: c1cy00131k.pdf [file c1cy00131k.pdf]

## Supporting information

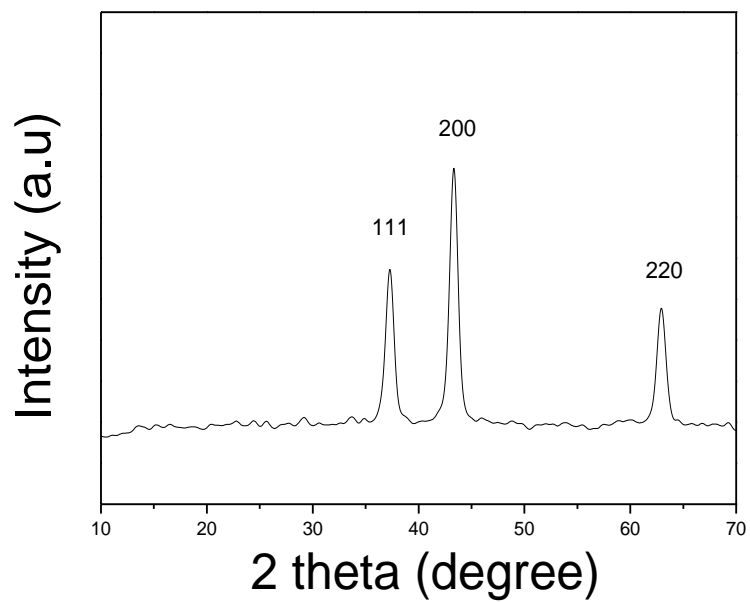

**Figure S1.** XRD patterns of referenced NiO nanoparticles (NiO-R)

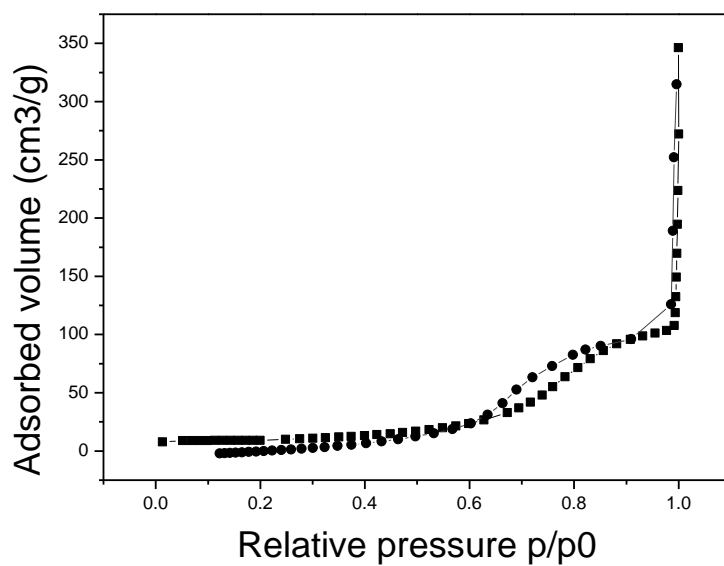

**Figure S2.** N<sub>2</sub> adsorption and desorption isotherms for NiO-R

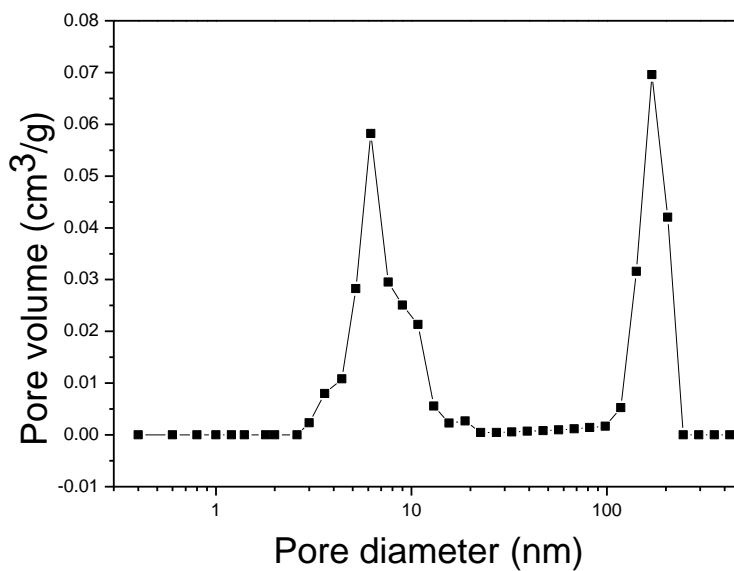

**Figure S3.** Pore size distribution calculated by BJH model calculation on the desorption branch data for NiO-R
